# Supplementary material for: Longer Axial Length Potentiates Relationship of Intraocular Pressure and Peripapillary Vessel Density in Glaucoma Patients
Source: PubMed Central journal article supplement — Invest Ophthalmol Vis Sci. 2021 Jul 26;62(9):37. doi: 10.1167/iovs.62.9.37 (PMC8322720; doi:10.1167/iovs.62.9.37), 2021-07-26
Supplement: iovs-62-9-37_s001.pdf [file iovs-62-9-37_s001.pdf]

Supplementary Table 1: Baseline systemic and ocular characteristics between non-glaucoma and glaucoma subjects by axial length groups

| Variables                        | Short AL                     | Long AL                       | p-value        | Short AL                     | Long AL                      | p-value        |
|----------------------------------|------------------------------|-------------------------------|----------------|------------------------------|------------------------------|----------------|
|                                  | Non-Glaucoma                 | Non-Glaucoma                  | Non-Glaucoma   | Glaucoma                     | Glaucoma                     | Glaucoma       |
| <b>Total Subjects (N)</b>        | 511                          | 523                           |                | 28                           | 40                           |                |
| <b>Total Eyes (N)</b>            | 703                          | 704                           |                | 37                           | 48                           |                |
| <b>Female gender<sup>†</sup></b> | 378 (78%)                    | 289 (55%)                     | < 0.001        | 18 (64%)                     | 25 (63%)                     | 0.67           |
| <b>Age (years)</b>               | 58.0 ± 9.7<br>(40 - 87)      | 58.0 ± 9.9<br>(40 - 91)       | 0.86           | 67.2 ± 8.1<br>(53 - 87)      | 64.6 ± 9.6<br>(45 - 90)      | 0.16           |
| <b>IOP (mm Hg)</b>               | 15.2 ± 3.0<br>(8 - 28)       | 15.2 ± 2.9<br>(7 - 27.7)      | 0.48           | 17.2 ± 6<br>(8 - 35)         | 18.4 ± 5.6<br>(10.7 - 34)    | 0.65           |
| <b>AL (mm)</b>                   | 22.8 ± 0.5<br>(20.6 - 23.4)  | 24.3 ± 0.7<br>(23.5 - 27.5)   | < <b>0.001</b> | 22.8 ± 0.4<br>(22 - 23.4)    | 24.4 ± 0.7<br>(23.5 - 27.7)  | < <b>0.001</b> |
| <b>RNFL (microns)</b>            | 93.7 ± 11.2<br>(52 - 138)    | 90.8 ± 10.5<br>(60 - 127)     | <b>0.0003</b>  | 77 ± 15.5<br>(51 - 109)      | 71.6 ± 13.6<br>(48 - 93)     | 0.178          |
| <b>pVD</b>                       | 0.36 ± 0.04<br>(0.18 - 0.45) | 0.339 ± 0.04<br>(0.22 - 0.44) | < <b>0.001</b> | 0.284 ± 0.1<br>(0.18 - 0.41) | 0.249 ± 0.6<br>(0.11 - 0.37) | <b>0.048</b>   |
| <b>SS</b>                        | 9.49 ± 0.76<br>(7 - 10)      | 9.15 ± 0.84<br>(7 - 10)       | < <b>0.001</b> | 9.05 ± 0.8<br>(7 - 10)       | 8.56 ± 0.87<br>(7 - 10)      | <b>0.009</b>   |

All variables denoted as mean ± standard deviation except for gender<sup>†</sup> which is expressed as frequency (percent). Range from minimum to maximum is given in the parenthesis. “P-value non-glaucoma” was calculated by comparing the short axial length non-glaucoma subjects versus long axial length non-glaucoma subject. The same was done for “p-value glaucoma” except that glaucoma subjects with short and long axial lengths were compared. P-value calculated for gender was determined by chi-square, age determined by simple wilcox t-test per subject. All other p-values generated from mixed linear effects model to control for inter-eye correlation. Significance level was 0.05. IOP=intraocular pressure; AL = axial length; RNFL = retinal nerve fiber layer thickness; pVD = peripapillary vessel density; SS = signal strength (on a scale of 1-10).

Supplementary Table 2: Multivariable mixed linear regressions of determinants of peripapillary vessel density (pVD) of non-glaucomatous eyes with IOP  $\geq 20$  with short versus long axial length.

| Variable      | IOP $\geq 20$     |                      |                  | IOP $\geq 20$    |                     |                  |
|---------------|-------------------|----------------------|------------------|------------------|---------------------|------------------|
|               | Non-glaucoma      |                      |                  | Non-glaucoma     |                     |                  |
|               | Short AL (N = 55) |                      |                  | Long AL (N = 55) |                     |                  |
|               | $\beta$           | CI                   | p-value          | $\beta$          | CI                  | p-value          |
| Age (years)   | -0.00154          | (-0.00239, -0.00070) | <b>&lt;0.001</b> | -0.00039         | (-0.00136, 0.00059) | 0.438            |
| IOP (mm Hg)   | -0.00177          | (-0.00548, -0.00194) | 0.350            | 0.00060          | (-0.00391, 0.00511) | <b>0.794</b>     |
| RNFL (micron) | 0.00241           | (0.00170, 0.00311)   | <b>&lt;0.001</b> | 0.00262          | (0.00197, 0.00326)  | <b>&lt;0.001</b> |
| SS            | 0.01300           | (0.00421, 0.02179)   | <b>0.004</b>     | 0.02129          | (0.01429, 0.02829)  | <b>&lt;0.001</b> |

Beta-estimate, CI and p-value generated from mixed linear effects model controlling for inter-eye correlation. Significance level was 0.05. IOP=intraocular pressure; RNFL = retinal nerve fiber layer thickness; SS = signal strength. Longer axial length was defined as  $\geq 23.46$  mm, the median for the study population.
